# Supplementary material for: Highly stable and sensitive LnMOF ratiometric thermometers constructed with mixed ligands
Source: Royal Society of Chemistry journal article supplement (doi:10.1039/c4dt03421j), 2014-12-15
Supplement: c4dt03421j1.pdf [file c4dt03421j1.pdf]

## Supplementary data and figures

**Table S1** Crystallographic data for the four compounds <sup>a</sup>

| Compound                                                      | Eu-OA-DSTP                                                                     | Tb-OA-DSTP                                                                     | Eu-BDC-DSTP                                                                     | Tb-BDC-DSTP                                                                     |
|---------------------------------------------------------------|--------------------------------------------------------------------------------|--------------------------------------------------------------------------------|---------------------------------------------------------------------------------|---------------------------------------------------------------------------------|
| Formula                                                       | EuC <sub>22</sub> H <sub>13</sub> N <sub>3</sub> O <sub>8</sub> S <sub>2</sub> | TbC <sub>22</sub> H <sub>13</sub> N <sub>3</sub> O <sub>8</sub> S <sub>2</sub> | EuC <sub>25</sub> H <sub>19</sub> N <sub>3</sub> O <sub>10</sub> S <sub>2</sub> | EuC <sub>25</sub> H <sub>19</sub> N <sub>3</sub> O <sub>10</sub> S <sub>2</sub> |
| Formula weight                                                | 633.43                                                                         | 670.39                                                                         | 737.51                                                                          | 744.47                                                                          |
| Crystal color                                                 | yellow                                                                         | yellow                                                                         | yellow                                                                          | yellow                                                                          |
| Dimensions/mm <sup>3</sup>                                    | 0.240×0.050×0.025                                                              | 0.135×0.027×0.021                                                              | 0.088×0.037×0.010                                                               | 0.144×0.092×0.040                                                               |
| Crystal system                                                | monoclinic                                                                     | monoclinic                                                                     | triclinic                                                                       | triclinic                                                                       |
| Space group                                                   | C2/c                                                                           | C2/c                                                                           | P $\bar{1}$                                                                     | P $\bar{1}$                                                                     |
| <i>a</i> /Å                                                   | 20.080(6)                                                                      | 19.929(7)                                                                      | 10.826(4)                                                                       | 10.803(3)                                                                       |
| <i>b</i> /Å                                                   | 18.657(5)                                                                      | 18.593(6)                                                                      | 12.044(4)                                                                       | 12.027(3)                                                                       |
| <i>c</i> /Å                                                   | 13.864(4)                                                                      | 13.833(5)                                                                      | 12.046(4)                                                                       | 12.040(3)                                                                       |
| $\alpha$ <sup>0</sup>                                         | 90                                                                             | 90                                                                             | 109.677(3)                                                                      | 109.6780(10)                                                                    |
| $\beta$ <sup>0</sup>                                          | 117.570(4)                                                                     | 117.925(4)                                                                     | 103.108(2)                                                                      | 103.133(3)                                                                      |
| $\gamma$ <sup>0</sup>                                         | 90                                                                             | 90                                                                             | 109.545(2)                                                                      | 109.48                                                                          |
| <i>V</i> /Å <sup>3</sup>                                      | 4604(2)                                                                        | 4529(3)                                                                        | 1287.7(7)                                                                       | 1283.1                                                                          |
| <i>Z</i>                                                      | 8                                                                              | 8                                                                              | 2                                                                               | 2                                                                               |
| <i>D</i> <sub>calcd</sub> /g cm <sup>-3</sup>                 | 1.914                                                                          | 1.967                                                                          | 1.902                                                                           | 1.927                                                                           |
| <i>F</i> (000)                                                | 2600                                                                           | 2616                                                                           | 730                                                                             | 734                                                                             |
| $\mu$ /mm <sup>-1</sup>                                       | 2.962                                                                          | 3.364                                                                          | 2.663                                                                           | 2.985                                                                           |
| $\theta$ for data collection <sup>0</sup>                     | 2.19 to 27.51                                                                  | 2.19 to 27.51                                                                  | 2.01 to 27.47                                                                   | 2.01 to 27.48                                                                   |
| Reflections collected                                         | 5094                                                                           | 5097                                                                           | 5571                                                                            | 5444                                                                            |
| Unique reflections/ <i>R</i> (int)                            | 4258/0.0524                                                                    | 4491/0.0563                                                                    | 5053/0.0426                                                                     | 4976/0.0421                                                                     |
| Parameters                                                    | 352                                                                            | 325                                                                            | 371                                                                             | 371                                                                             |
| GOF                                                           | 1.027                                                                          | 1.044                                                                          | 1.067                                                                           | 1.036                                                                           |
| <i>R</i> 1, <i>wR</i> 2 ( <i>I</i> > 2 $\sigma$ ( <i>I</i> )) | 0.0535, 0.1395                                                                 | 0.0591, 0.1440                                                                 | 0.0359, 0.1069                                                                  | 0.0339, 0.1029                                                                  |
| <i>R</i> 1, <i>wR</i> 2 (all data)                            | 0.0644, 0.1471                                                                 | 0.0698, 0.1585                                                                 | 0.0442, 0.1543                                                                  | 0.0441, 0.1623                                                                  |

$$^a RI = \sum(|F_o| - |F_c|) / \sum|F_o|, wR2 = [\sum w(F_o^2 - F_c^2)^2 / \sum w(F_o^2)^2]^{0.5}$$

**Table S2** The molar ratio of Tb<sub>x</sub>Eu<sub>1-x</sub>-OA-DSTP and Tb<sub>x</sub>Eu<sub>1-x</sub>-BDC-DSTP calculated by Inductively coupled plasma (ICP) analysis.

| Sample                                          | The molar ratio of the starting Tb/Eu salt | The Tb/Eu ratio calculated by ICP analysis |
|-------------------------------------------------|--------------------------------------------|--------------------------------------------|
| Tb <sub>0.99</sub> Eu <sub>0.01</sub> -OA-DSTP  | 0.99:0.01                                  | 0.9873:0.0125                              |
| Tb <sub>0.99</sub> Eu <sub>0.01</sub> -BDC-DSTP | 0.99:0.01                                  | 0.9915:0.0096                              |
| Tb <sub>0.98</sub> Eu <sub>0.02</sub> -OA-DSTP  | 0.98:0.02                                  | 0.9792:0.0193                              |
| Tb <sub>0.98</sub> Eu <sub>0.02</sub> -BDC-DSTP | 0.98:0.02                                  | 0.9814:0.0208                              |

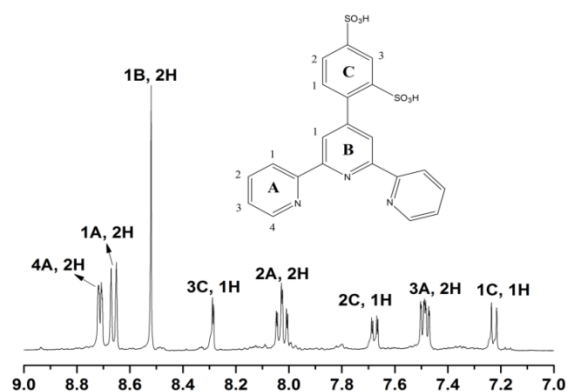

**Fig. S1**  $^1\text{H}$  NMR (DMSO) of 2,4-(2,2':6',2''-terpyridin-4'-yl)-benzenedisulfonic acid.

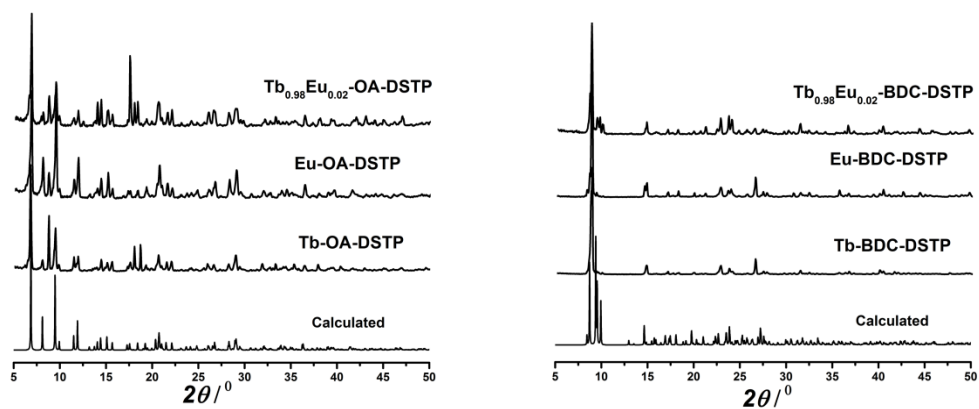

**Fig. S2** Powder X-ray diffraction (PXRD) patterns.

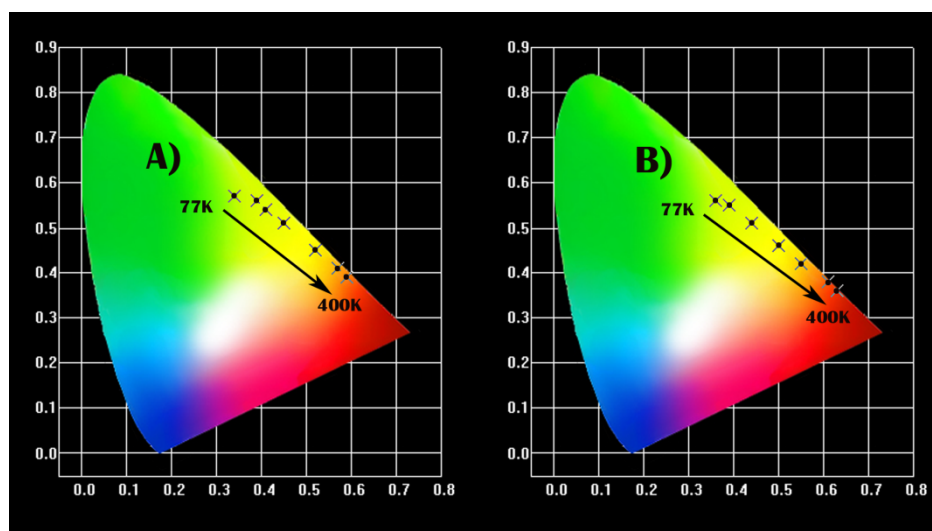

**Fig. S3** The Commission International d'Éclairage (CIE) chromaticity diagram showing the luminescence color of  $\text{Tb}_{0.98}\text{Eu}_{0.02}\text{-OA-DSTP}$  (a) and  $\text{Tb}_{0.98}\text{Eu}_{0.02}\text{-BDC-DSTP}$  (b) at different temperature.

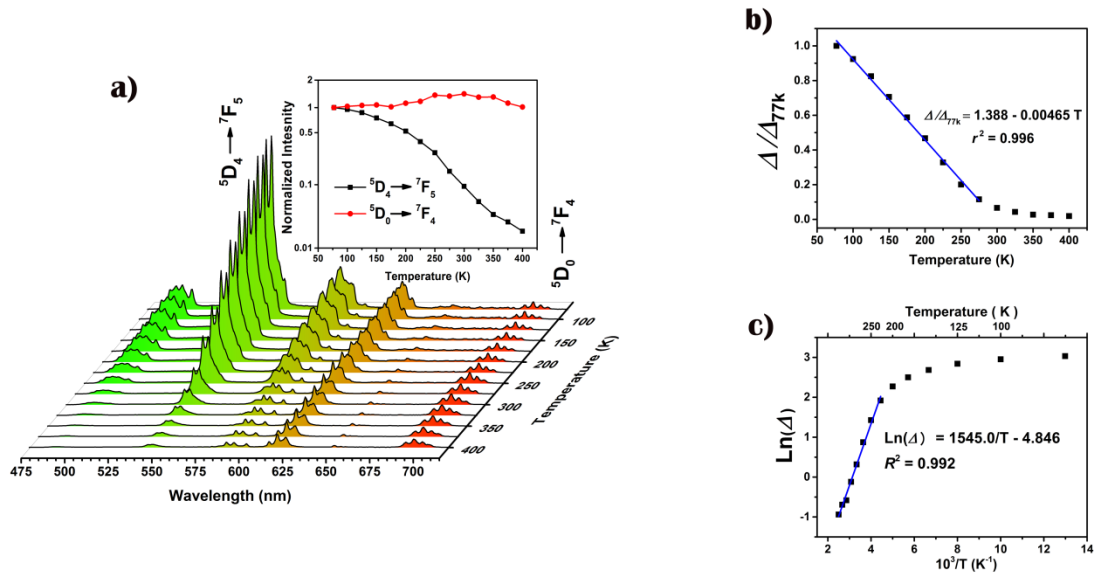

**Fig. S4** The ratiometric temperature-sensing properties of Tb<sub>0.99</sub>Eu<sub>0.01</sub>-OA-DSTP: (a) emission spectra for the solid sample recorded between 77 and 400K upon excitation at 360nm, inset: normalized emission intensities of <sup>5</sup>D<sub>4</sub>→<sup>7</sup>F<sub>5</sub> transition of Tb<sup>3+</sup> (546nm) and <sup>5</sup>D<sub>0</sub>→<sup>7</sup>F<sub>4</sub> transition of Eu<sup>3+</sup> (696nm); (b) temperature-dependent intensity ratio ( $\Delta/\Delta_{77k}$ ) and linearly fitted curve; (c) the natural logarithm of the thermometric parameter  $\Delta$  changing with the inverse of temperature and the linearly fitted curve.

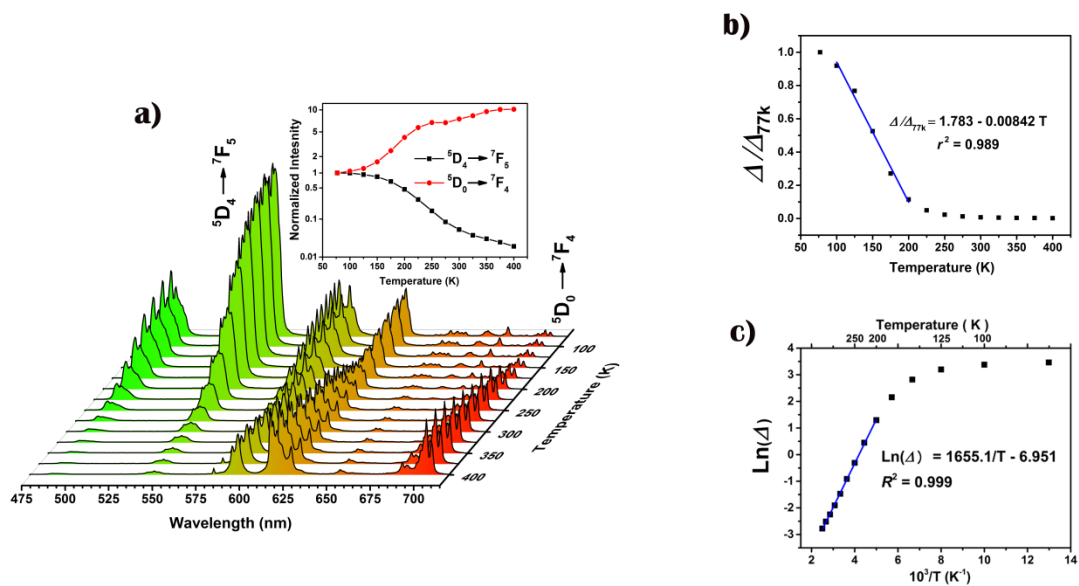

**Fig. S5** The ratiometric temperature-sensing properties of Tb<sub>0.99</sub>Eu<sub>0.01</sub>-BDC-DSTP: (a) emission spectra for the solid sample recorded between 77 and 400K upon excitation at 360nm, inset: normalized emission intensities of <sup>5</sup>D<sub>4</sub>→<sup>7</sup>F<sub>5</sub> transition of Tb<sup>3+</sup> (546nm) and <sup>5</sup>D<sub>0</sub>→<sup>7</sup>F<sub>4</sub> transition of Eu<sup>3+</sup> (702nm); (b) temperature-dependent intensity ratio ( $\Delta/\Delta_{77k}$ ) and linearly fitted curve; (c) the natural logarithm of the thermometric parameter  $\Delta$  changing with the inverse of temperature and the linearly fitted curve.

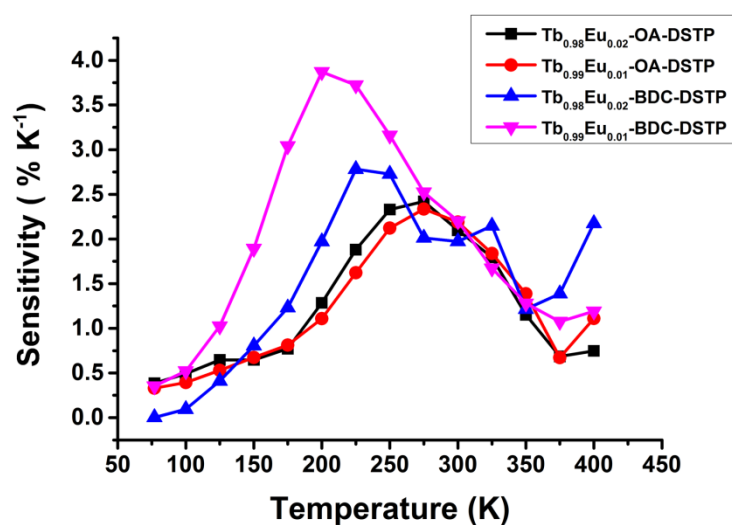

Fig. S6 Relative sensitivity of the thermometers  $Tb_{1-x}Eu_x$ -OA-DSTP and  $Tb_{1-x}Eu_x$ -BDC-DSTP ( $x = 0.01, 0.02$ ).

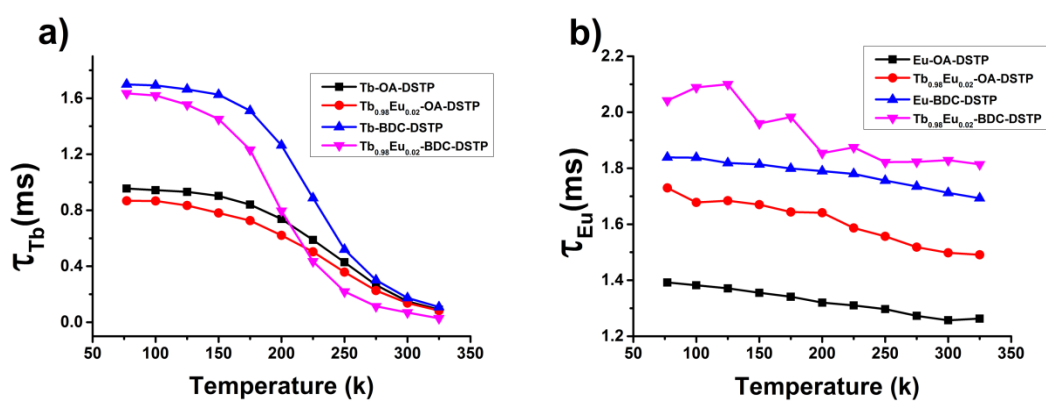

Fig. S7 The comparison of lifetimes of  $Tb^{3+}$  (a) and  $Eu^{3+}$  (b) in the pure MOFs and Tb/Eu-codoping MOFs.

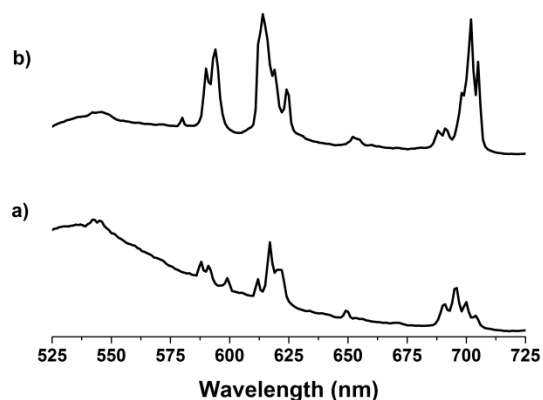

Fig. S8 The emission spectra of  $Tb_{0.98}Eu_{0.02}$ -OA-DSTP (a) and  $Tb_{0.98}Eu_{0.02}$ -BDC-DSTP (b) upon excitation of 488nm at room temperature.

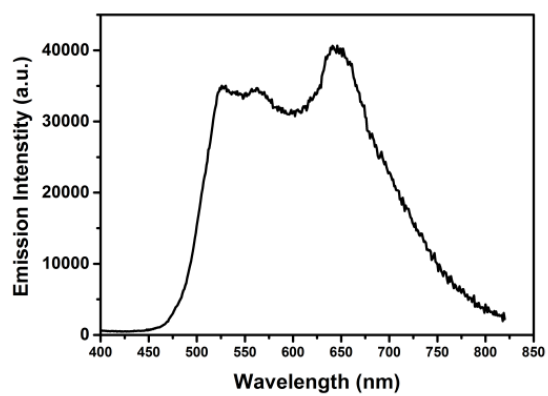

**Fig. S9** Phosphorescence spectrum of Gd-OA-DSTP in the solid state at 77K.
